# Supplementary material for: Synergistic Cytokine Production by ATP and PGE2 via P2X4 and EP3 Receptors in Mouse Bone-Marrow-Derived Mast Cells
Source: MDPI journal article supplement (doi:10.3390/cells11040616), 2022-02-10
Supplement: s1 [file s1]

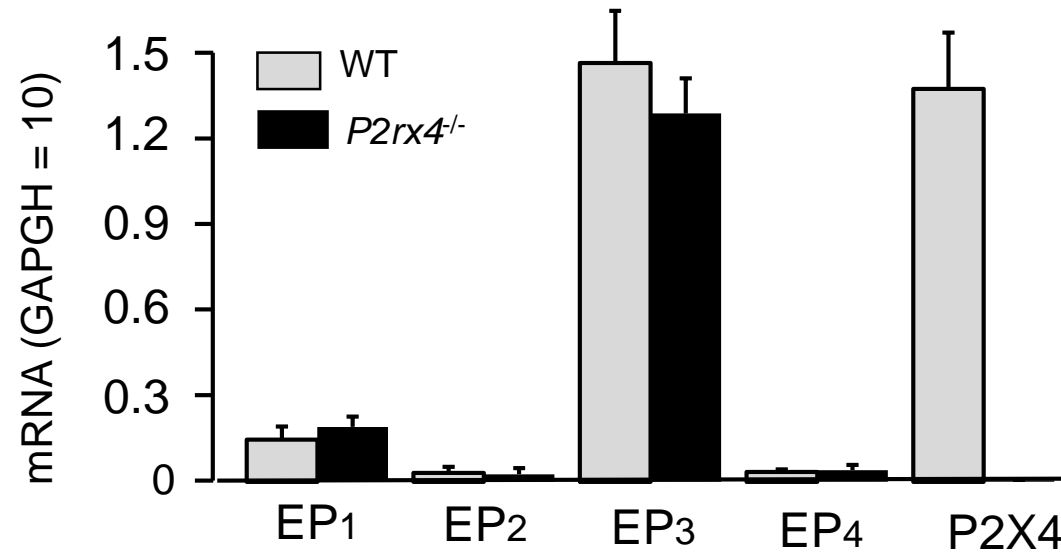

### Supplemental Figure S1

Expression of mRNAs for EP receptor subtypes in BMMC obtained from wild type (WT) and P2X4 receptor deficient (*P2rx4*<sup>-/-</sup>) mice. EP<sub>1</sub>, EP<sub>2</sub>, EP<sub>3</sub>, EP<sub>4</sub> and P2X4 receptor mRNA expression were examined by quantitative RT-PCR. Data were normalized to GAPDH mRNA levels. Values are shown as mean  $\pm$  SEM (n = 3).

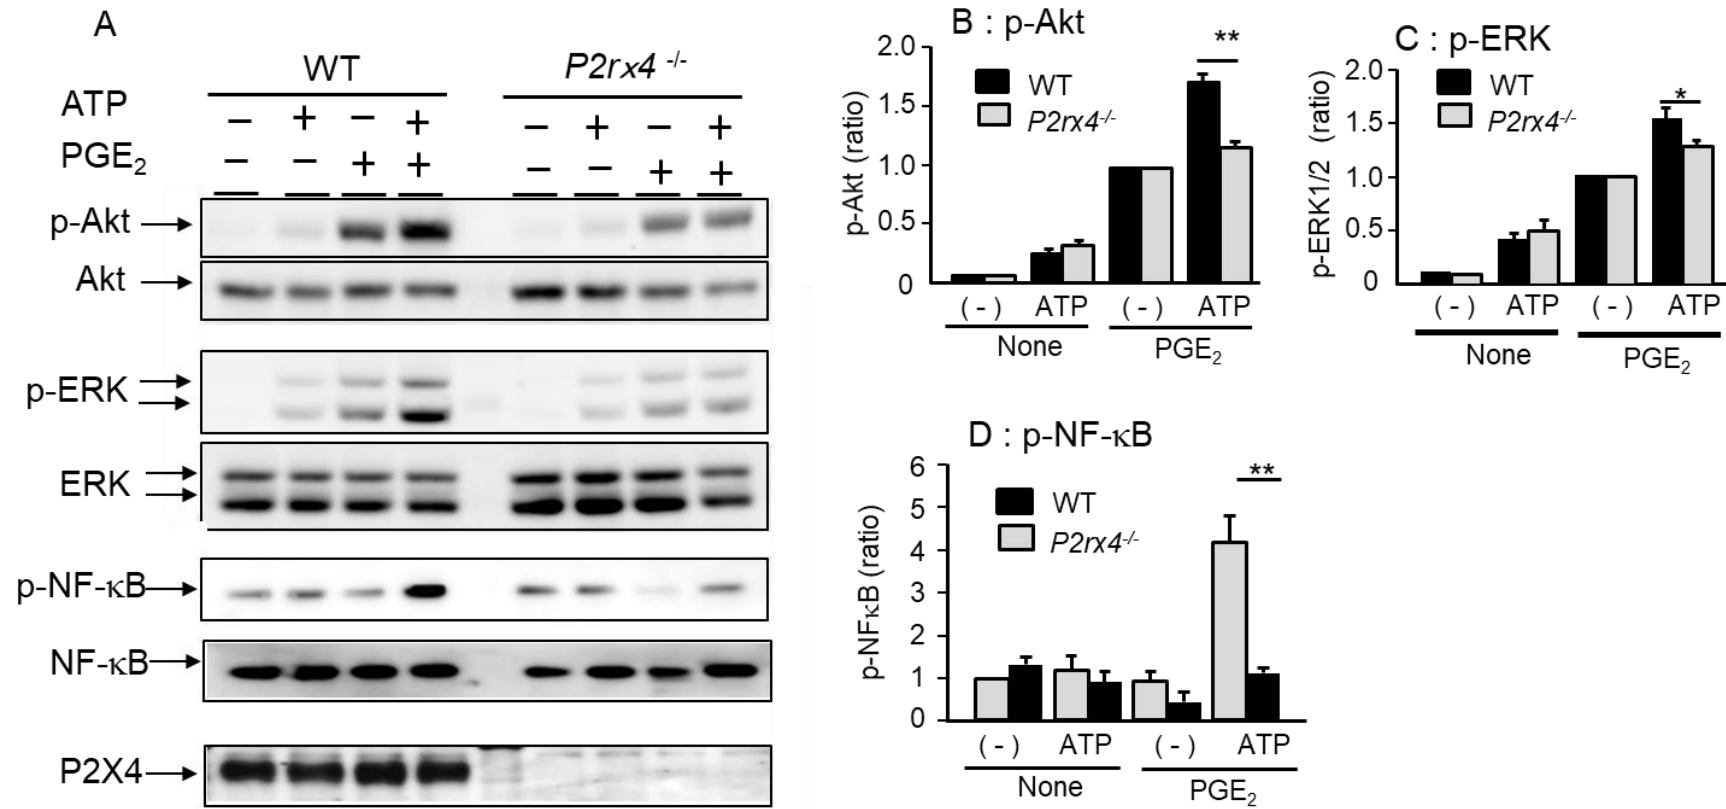

## Supplemental Figure S2

Effects of co-stimulation of ATP and PGE<sub>2</sub> on the phosphorylation of ERK1/2, Akt, and NF-κB. (A) BMMCs prepared from WT (left) and *P2rx4*<sup>-/-</sup> mice (right) were stimulated with vehicle or PGE<sub>2</sub> (0.1 μM) with or without ATP (100 μM) for 5 min to evaluate phospho-NF-κB or for 20 min to examine phospho-Akt and phospho-ERK1/2. Cell lysates were subjected to western blot analysis. P2X4R protein was examined with anti-P2X4R antibody. (B,C,D) The densitometry value of protein bands of phospho-Akt (B), phospho-ERK 1/2 (C) are shown as relative intensity as 1 for the results obtained with PGE<sub>2</sub> alone. The densitometry values of the protein band of phospho-NF-κB (D) were shown as relative intensity as 1 for the results obtained in unstimulated cells (none). Data are shown as mean ± SEM (n = 3). \*P < 0.05, \*\*P < 0.01.
